# Supplementary material for: Assemblies of several supramolecular networks containing quinoline-2,3-dicarboxylic acid
Source: Royal Society of Chemistry journal article supplement (doi:10.1039/c3nj40783g), 2013-01-01

# Electronic Supporting Information

For

## **Solvent/temperature-dependent assemblies of several high-dimensional supramolecular networks containing quinoline-2,3-dicarboxylic acid**

**Xu-Jia Hong,<sup>a,b</sup> Ming-Fang Wang,<sup>a</sup> Hong-Yang Jia,<sup>a</sup> Wei-Xing Li,<sup>a</sup> Jing Li,<sup>a</sup> Yi-Ting Liu,<sup>a</sup> Hong-Guang Jin<sup>a</sup> and Yue-Peng Cai<sup>\*a,b</sup>**

*<sup>a</sup>School of Chemistry and Environment, South China Normal University, Key Laboratory of the energy conversion and energy storage materials Guangzhou 510006, P. R. China. <sup>b</sup>State Key laboratory of Coordination Chemistry, Nanjing University.*

## Contents

1. Table **S1**: Crystal data and structure refinement for complexes **1-4**.
2. Table **S2**: Selected Bond Distances (Å) and Angles (°) for complexes **1-4**.
3. Table **S3**: Distances (Å) and angles (°) of hydrogen bonds for the compounds **1-4**.
4. Figure **S1**: IR spectra of compounds **1-4**.
5. Figure **S2**: The thermal analyses (N<sub>2</sub>) of the crystalline **1-4** (TG curves).
6. Figure **S3**: 3-D supramolecular framework with 1-D channels of 6.1 × 6.5 Å occupied by solvent benzene molecules through the inter-layer  $\pi\cdots\pi$  weak interaction from two quinoline rings (the shortest distance between two quinoline rings is about 3.56 Å) and hydrogen bonds O-H $\cdots$ O from the coordinated water molecules.
7. Figure **S4**: Experimental (at 25 °C and 245 °C) and simulated XRPD patterns of (a) **1**; (b) **2**; (c) **3**; (b) **4**.

Table S1. Crystal data and structure refinement for complexes 1-4.

| Complexes                                                                                              | 1                                                                 | 2                                                                                | 3                                                                 | 4                                                                |
|--------------------------------------------------------------------------------------------------------|-------------------------------------------------------------------|----------------------------------------------------------------------------------|-------------------------------------------------------------------|------------------------------------------------------------------|
| Empirical formula                                                                                      | C <sub>22</sub> H <sub>16</sub> N <sub>2</sub> O <sub>10</sub> Zn | C <sub>26</sub> H <sub>24</sub> N <sub>2</sub> O <sub>10</sub> S <sub>2</sub> Zn | C <sub>28</sub> H <sub>22</sub> N <sub>2</sub> O <sub>10</sub> Zn | C <sub>22</sub> H <sub>12</sub> N <sub>2</sub> O <sub>8</sub> Zn |
| Formula weight                                                                                         | 533.74                                                            | 653.96                                                                           | 611.85                                                            | 497.71                                                           |
| Temperature                                                                                            | 298(2) K                                                          | 298(2) K                                                                         | 298(2) K                                                          | 298(2) K                                                         |
| Wavelength                                                                                             | 0.71073 Å                                                         | 0.71073 Å                                                                        | 0.71073 Å                                                         | 0.71073 Å                                                        |
| Crystal system                                                                                         | triclinic                                                         | triclinic                                                                        | monoclinic                                                        | monoclinic                                                       |
| Space group                                                                                            | <i>P</i> -1                                                       | <i>P</i> -1                                                                      | <i>C</i> 2/ <i>c</i>                                              | <i>P</i> 2 <sub>1</sub> / <i>n</i>                               |
| <i>a</i> (Å)                                                                                           | 7.4062(17)                                                        | 8.453(5)                                                                         | 17.912(4)                                                         | 12.693(4)                                                        |
| <i>b</i> (Å)                                                                                           | 9.136(2)                                                          | 9.025(5)                                                                         | 7.1061(15)                                                        | 5.7903(19)                                                       |
| <i>c</i> (Å)                                                                                           | 9.415(3)                                                          | 9.160(6)                                                                         | 20.966(4)                                                         | 13.581(5)                                                        |
| $\alpha$ (°)                                                                                           | 110.466(4)                                                        | 76.339(8)                                                                        | 90                                                                | 90                                                               |
| $\beta$ (°)                                                                                            | 98.320(4)                                                         | 85.010(9)                                                                        | 107.440(2)                                                        | 115.966(4)                                                       |
| $\gamma$ (°)                                                                                           | 111.664(3)                                                        | 73.885(8)                                                                        | 90                                                                | 90                                                               |
| <i>V</i> (Å <sup>3</sup> )                                                                             | 526.6(2)                                                          | 652.2(7)                                                                         | 2545.9(9)                                                         | 897.4(5)                                                         |
| <i>Z</i>                                                                                               | 1                                                                 | 1                                                                                | 4                                                                 | 2                                                                |
| $\rho$ (cald.) (mg m <sup>-3</sup> )                                                                   | 1.683                                                             | 1.665                                                                            | 1.596                                                             | 1.842                                                            |
| $\mu$ (m <sup>-1</sup> )                                                                               | 1.232                                                             | 1.166                                                                            | 1.031                                                             | 1.431                                                            |
| <i>F</i> (000)                                                                                         | 272                                                               | 336                                                                              | 1256                                                              | 504                                                              |
| Crystal size (mm)                                                                                      | 0.26 × 0.18 × 0.11                                                | 0.18 × 0.15 × 0.09                                                               | 0.22 × 0.16 × 0.09                                                | 0.25 × 0.21 × 0.16                                               |
| $\theta$ range for data collection (°)                                                                 | 2.43 to 25.20                                                     | 2.29 to 25.19                                                                    | 2.04 to 25.20                                                     | 1.83 to 25.20                                                    |
| <i>h</i> / <i>k</i> / <i>l</i> (max, min)                                                              | -6, 8/-10, 10/-10, 11                                             | -9, 10/-10, 10/-8, 10                                                            | -18, 21/-8, 6/-24, 25                                             | -12, 15/-6, 6/-16, 14                                            |
| Reflections collected                                                                                  | 2731                                                              | 3366                                                                             | 6252                                                              | 4341                                                             |
| Unique                                                                                                 | 1861 [R(int) = 0.0250]                                            | 2307 [R(int) = 0.0307]                                                           | 2300[R(int) = 0.0306]                                             | 1609 [R(int) = 0.0583]                                           |
| Completeness to $\theta = 27.13$                                                                       | 98.0 %                                                            | 98.4 %                                                                           | 99.7 %                                                            | 99.3 %                                                           |
| Absorption correction                                                                                  | empirical                                                         | empirical                                                                        | empirical                                                         | empirical                                                        |
| Max. and min. transmission                                                                             | full-matrix                                                       | full-matrix                                                                      | full-matrix                                                       | full-matrix                                                      |
|                                                                                                        | least-squares on <i>F</i> <sup>2</sup>                            | least-squares on <i>F</i> <sup>2</sup>                                           | least-squares on <i>F</i> <sup>2</sup>                            | least-squares on <i>F</i> <sup>2</sup>                           |
| Data / restraints / parameters                                                                         | 1861 / 3 / 165                                                    | 2307 / 0 / 190                                                                   | 2300 / 4 / 195                                                    | 1609 / 1 / 155                                                   |
| Goodness-of-fit on <i>F</i> <sup>2</sup>                                                               | 1.074                                                             | 1.047                                                                            | 1.099                                                             | 1.003                                                            |
| Final <i>R</i> 1 <sup>a</sup> , <i>wR</i> 2 <sup>b</sup> indices [ <i>I</i> > 2 $\sigma$ ( <i>I</i> )] | 0.0543, 0.1331                                                    | 0.0576, 0.1265                                                                   | 0.0594, 0.1812                                                    | 0.0496, 0.1038                                                   |
| <i>R</i> 1, <i>wR</i> 2 indices (all data)                                                             | 0.383 / -0.709                                                    | 0.397 / -0.650                                                                   | 0.706 / -0.656                                                    | 0.409 / -0.550                                                   |
| Largest diff. Peak/ hole (e Å <sup>-3</sup> )                                                          |                                                                   |                                                                                  |                                                                   |                                                                  |

<sup>a</sup>  $R = \frac{\sum ||F_o| - |F_c||}{\sum |F_o|}$ . <sup>b</sup>  $wR = \left[ \frac{\sum w(|F_o|^2 - |F_c|^2)^2}{\sum w(F_o^2)} \right]^{1/2}$ .  $w = 1/[\sigma^2(F_o^2) + (0.0433P)^2 + 1.8091P]$  for **1**,  $1/[\sigma^2(F_o^2) + (0.0491P)^2 + 1.3878P]$  for **2**,  $1/[\sigma^2(F_o^2) + (0.1077P)^2 + 15.9016P]$  for **3** and  $w = 1/[\sigma^2(F_o^2) + (0.0393P)^2 + 2.0990P]$  for **4**,  $P = (F_o^2 + 2F_c^2)/3$ .

**Table S2.** Selected Bond Distances (Å) and Angles (°) for complexes **1-4\***.

|                   |           |                   |            |
|-------------------|-----------|-------------------|------------|
| <b>1</b>          |           |                   |            |
| Zn(1)-O(2)        | 2.031(3)  | O(2)-Zn(1)-N(1)   | 75.25(12)  |
| Zn(1)-O(3)        | 2.091(3)  | O(2)-Zn(1)-N(1)#1 | 104.75(12) |
| Zn(1)-N(1)        | 2.221(3)  | O(3)-Zn(1)-N(1)   | 90.72(13)  |
| O(2)-Zn(1)-O(3)   | 89.79(13) | O(3)-Zn(1)-N(1)#1 | 89.28(13)  |
| O(2)-Zn(1)-O(3)#1 | 90.21(14) |                   |            |
| <b>2</b>          |           |                   |            |
| Zn(1)-O(1)        | 2.000(3)  | O(6)-Zn(1)-N(1)#2 | 88.19(15)  |
| Zn(1)-O(5)        | 2.110(4)  | O(1)-Zn(1)-N(1)   | 77.05(14)  |
| Zn(1)-N(1)        | 2.126(4)  | O(6)-Zn(1)-N(1)   | 91.81(15)  |
| O(1)-Zn(1)-O(6)#2 | 86.02(15) | O(1)-Zn(1)-N(1)#2 | 102.95(14) |
| O(1)-Zn(1)-O(6)   | 93.97(15) |                   |            |
| <b>3</b>          |           |                   |            |
| Zn(1)-O(1)        | 2.034(3)  | O(1)-Zn(1)-N(1)   | 74.24(14)  |
| Zn(1)-O(3)        | 2.052(4)  | O(3)-Zn(1)-N(1)   | 91.64(15)  |
| Zn(1)-N(1)        | 2.254(4)  | O(1)-Zn(1)-N(1)#2 | 105.76(14) |
| O(1)-Zn(1)-O(3)#2 | 91.67(16) | O(3)-Zn(1)-N(1)#2 | 88.36(15)  |
| O(1)-Zn(1)-O(3)   | 88.33(16) |                   |            |
| <b>4</b>          |           |                   |            |
| Zn(1)-O(1)        | 1.892(3)  | O(1)-Zn(1)-N(1)#3 | 98.55(14)  |
| Zn(1)-N(1)        | 2.127(3)  | O(1)-Zn(1)-N(1)   | 81.45(14)  |
| Zn(1)-O(3)#4      | 2.476(3)  | O(1)-Zn(1)-O(3)#5 | 90.19(13)  |
| Zn(1)-O(3)#5      | 2.476(3)  | N(1)-Zn(1)-O(3)#4 | 85.30(12)  |
| N(1)-Zn(1)-O(3)#5 | 94.70(12) |                   |            |

\*Symmetry transformations used to generate equivalent atoms: #1 -x,-y,-z+1; #2 -x+1,-y+1,-z; #3 -x+2,-y,-z+2; #4 -x+3/2,y+1/2,-z+3/2; #5 x+1/2,-y-1/2,z+1/2.

Table S3. Distances (Å) and angles (°) of hydrogen bonds for the compounds **1-4**.\*

| D-H...A            | d(H...A) | d(D...A) | ∠D-H...A |
|--------------------|----------|----------|----------|
| <b>1</b>           |          |          |          |
| O4-H4...O1         | 1.55     | 2.387(5) | 176      |
| O3-H3A...O5#1      | 1.94     | 2.743(5) | 165      |
| O3-H3B...O4#2      | 1.97     | 2.795(4) | 177      |
| C8-H8...O1#3       | 2.52     | 3.385(5) | 136      |
| $\pi \cdots \pi^a$ | 3.58     |          |          |
| <b>2</b>           |          |          |          |
| O3-H3...O2         | 1.63     | 2.444(6) | 173      |
| C12-H12A...O4#4    | 2.52     | 3.425(6) | 157      |
| C13-H13C...O4#4    | 2.71     | 3.572(6) | 145      |
| C13-H13B...O1#5    | 2.66     | 3.582(5) | 160      |
| C13-H13B...O2#5    | 2.63     | 3.486(6) | 148      |
| C8-H8...O3#6       | 2.48     | 3.267(5) | 142      |
| C9-H9...O2#6       | 2.68     | 3.572(5) | 161      |
| $\pi \cdots \pi^a$ | 3.71     |          |          |
| <b>3</b>           |          |          |          |
| O3-H3A...O5#7      | 1.94     | 2.747(5) | 144      |
| O3-H3A...O3#8      | 2.33     | 3.130(4) | 154      |
| O4-H4...O2         | 1.69     | 2.386(5) | 165      |
| C8-H8...O4#9       | 2.63     | 3.430(5) | 145      |
| C9-H9...O2#9       | 2.69     | 3.515(6) | 148      |
| C7-H7... $\pi^b$   | 2.63     |          |          |
| $\pi \cdots \pi^b$ | 3.56     |          |          |
| <b>4</b>           |          |          |          |
| O3-H3...O2#10      | 1.74     | 2.570(5) | 171      |
| C10-H10...O4#11    | 2.68     | 2.723(3) | 156      |

\*Symmetry transformation used to generate equivalent atoms: #1 x-1,y-1,z; #2 -x, -y+1, -z+1; #3 -x-2, y-1/2, -z+1/2; #4 -x-1, y-1/2, -z+1/2; #5 -x,-y,-z+1; #6 x-1,y,z; #7 x-1/2,y+1/2,z; #8 -x+1,-y+2,-z; #9 -x-1,-y,-z; #10 -x+3/2,y+1/2, -z+3/2; #11 x-1/2,y,-z+1/2. <sup>a</sup>Denotes distances between the centroids of quinoline rings, <sup>b</sup>denotes the shortest distance between two quinoline rings in crystal lattice of compound **3**.

## Figure S1

(a) For compound 1

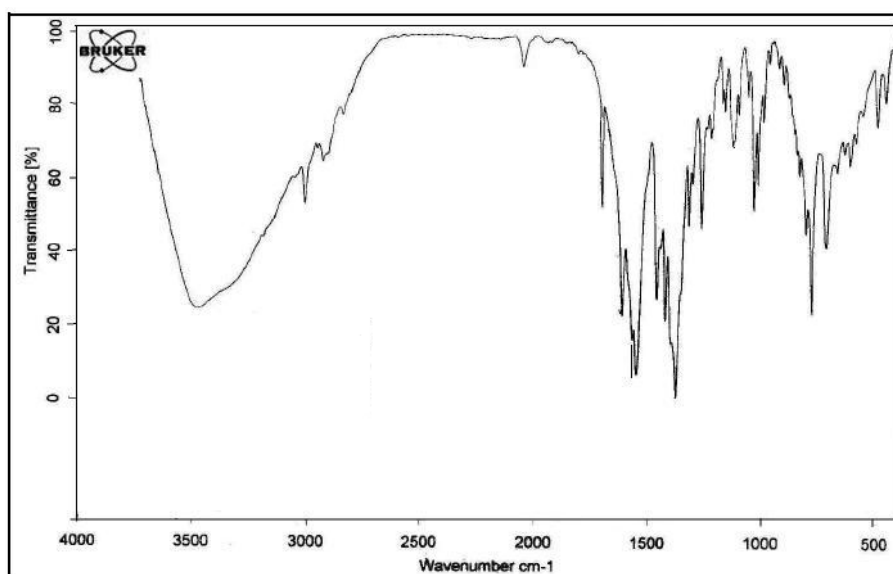

(b) For compound 2

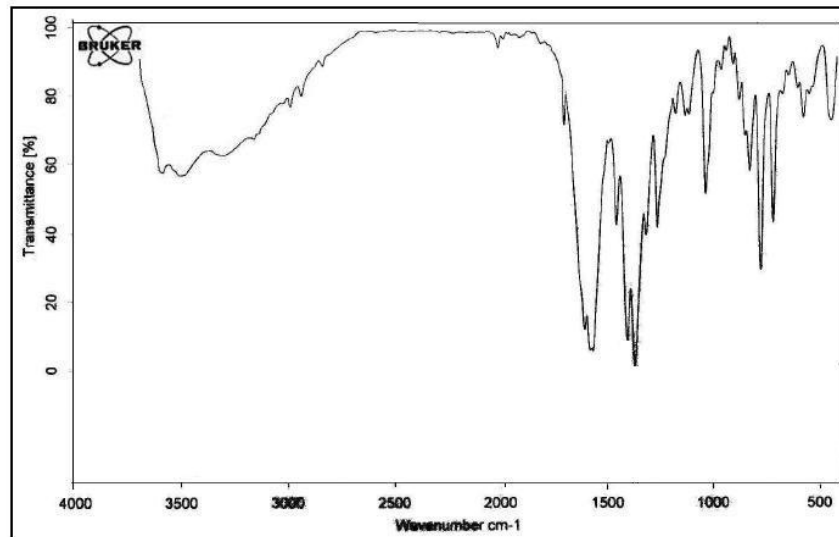

(c) For compound 3

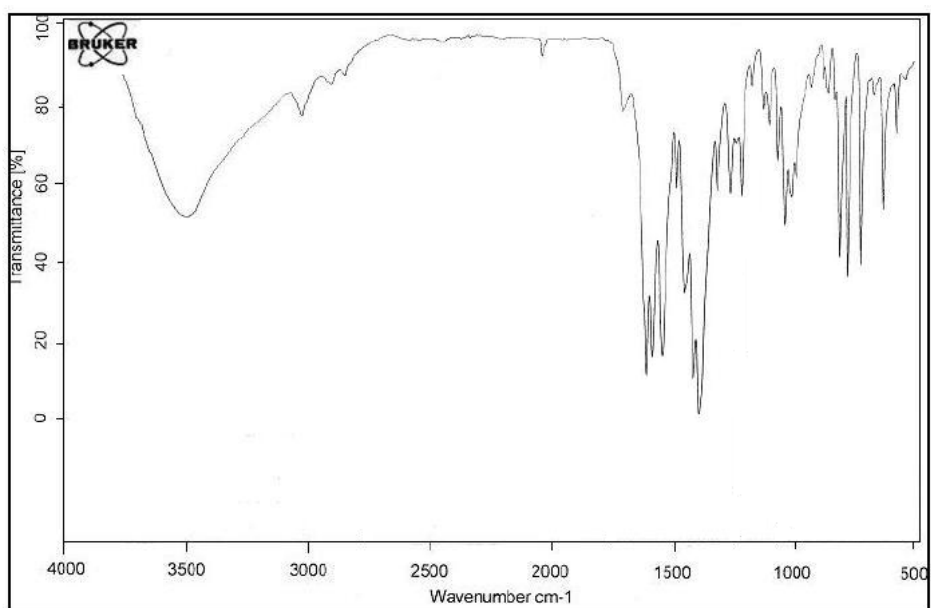

(d) For compound 4

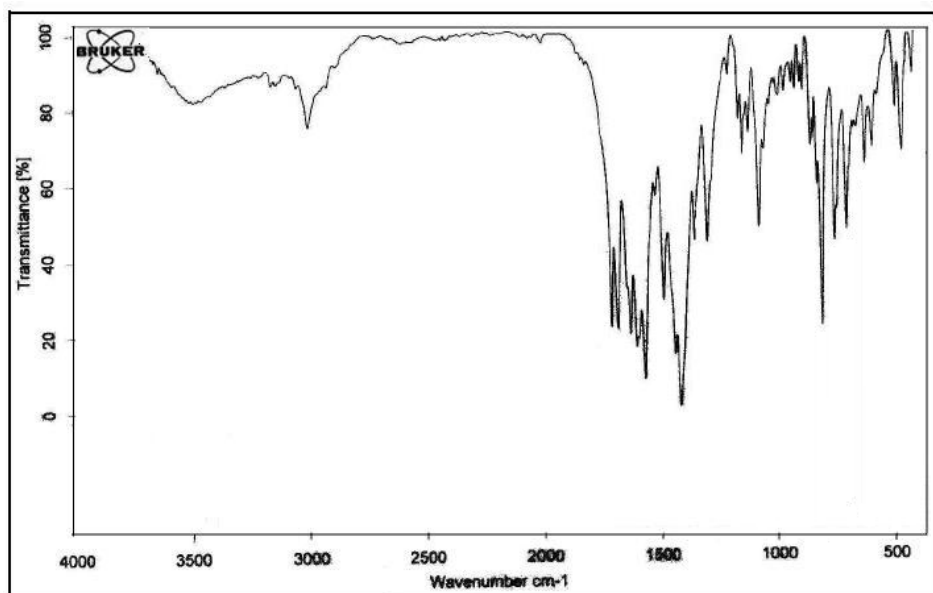

## Figure S2

(a) for compound 1

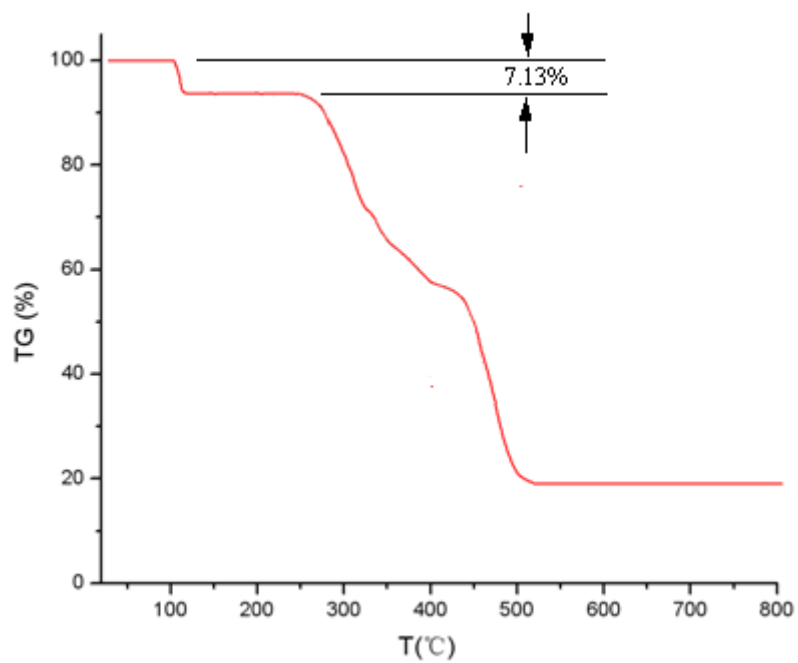

(b) for compound 2

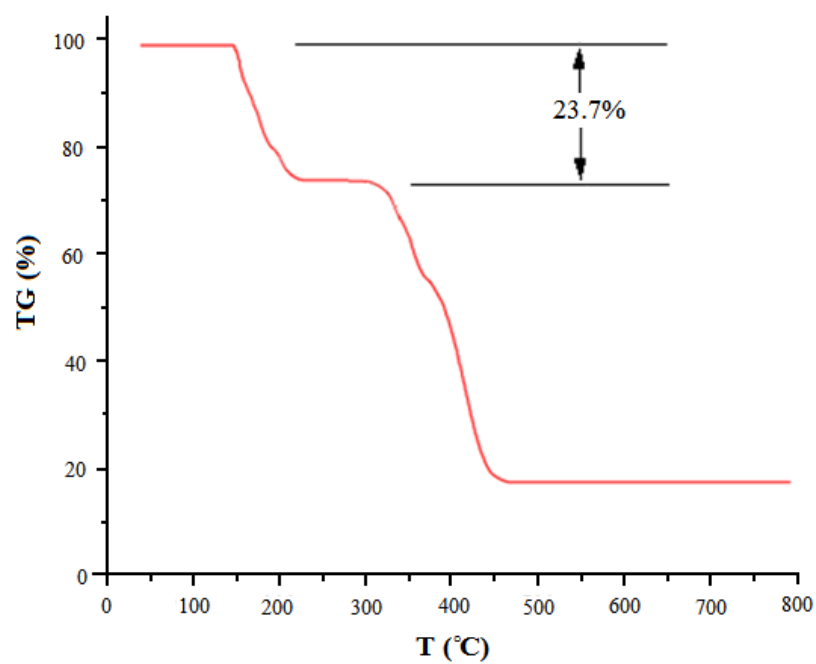



(c) for compound **3**

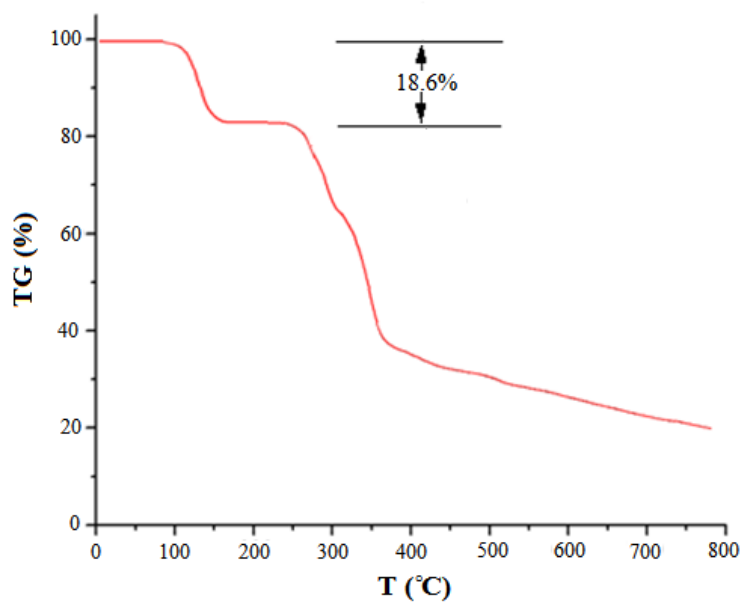

(d) for compound **4**

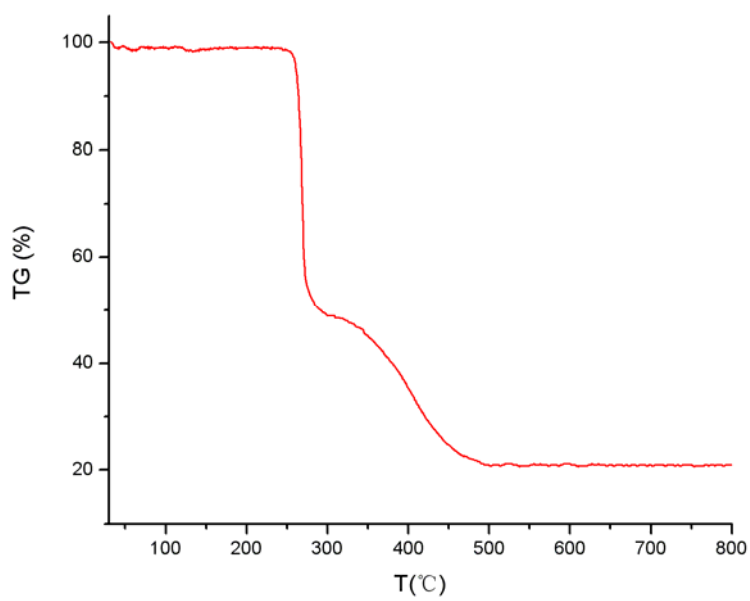

**Figure S3**

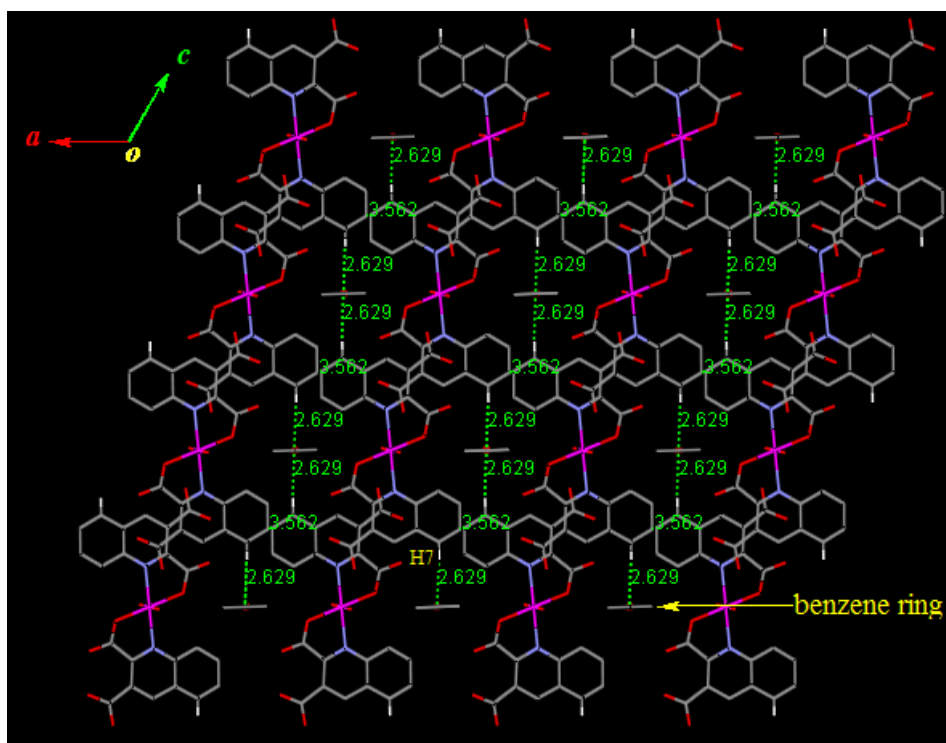

**Figure S4**

**(a) For compound 1**

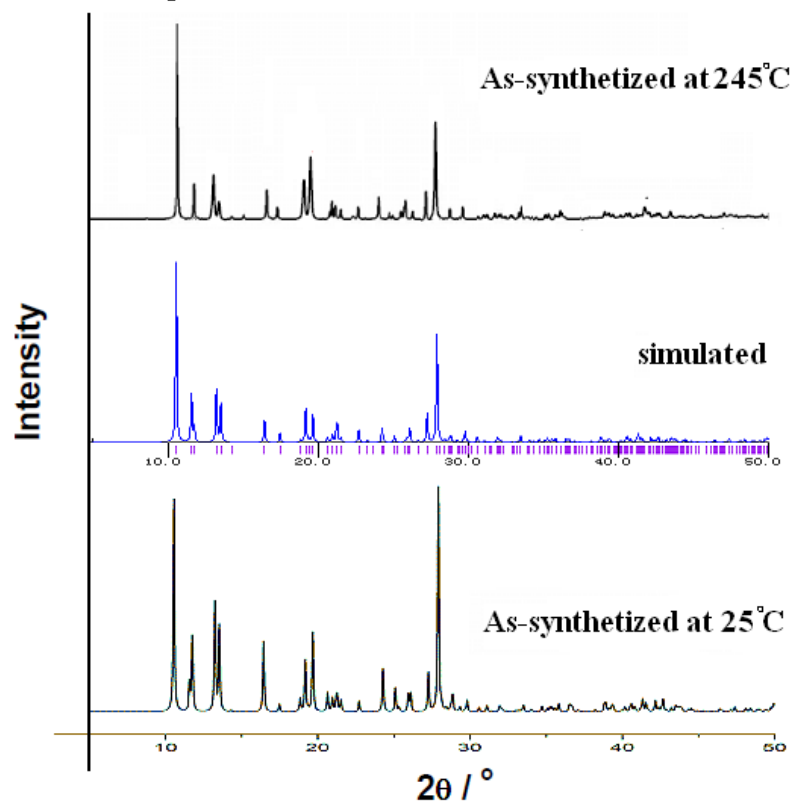

**(b) For compound 2**

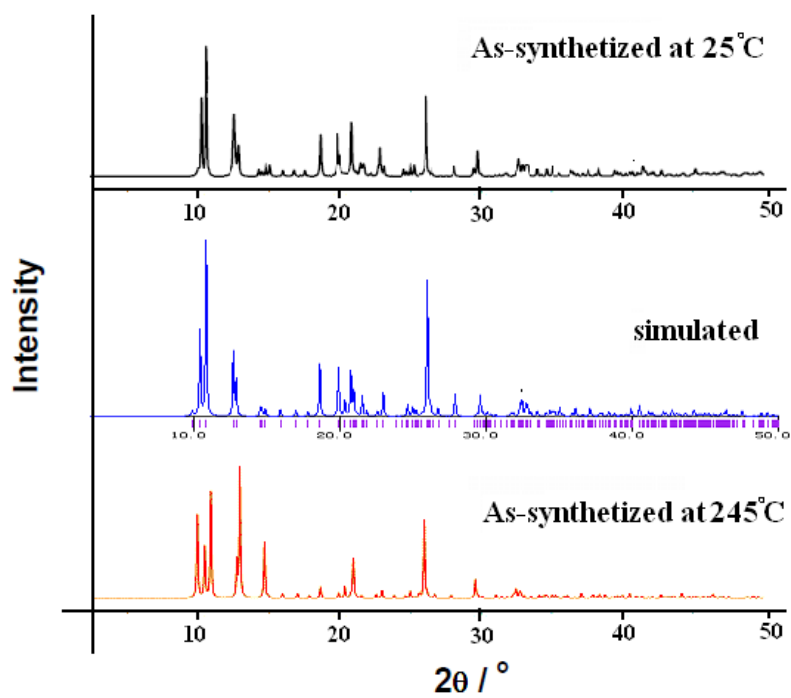

(c) For compound 3

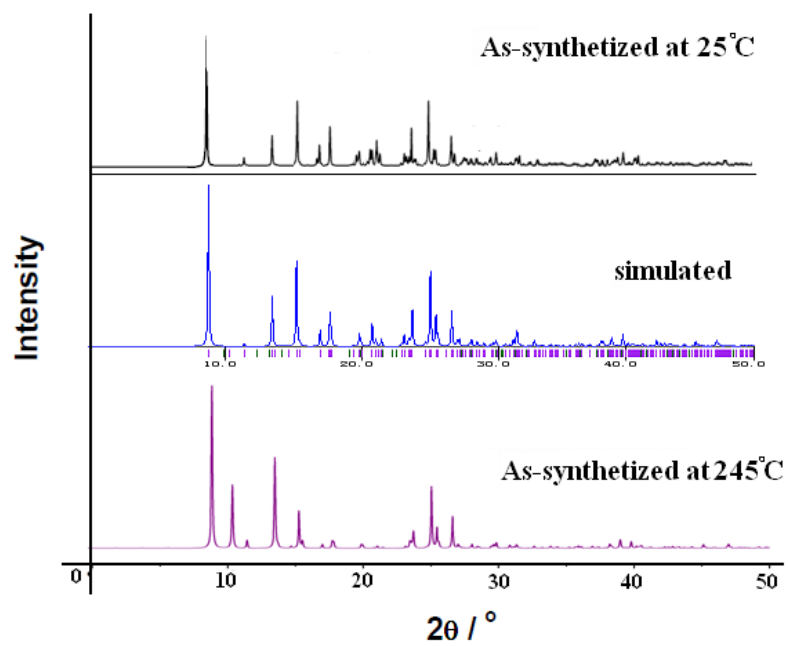

(d) compound 4

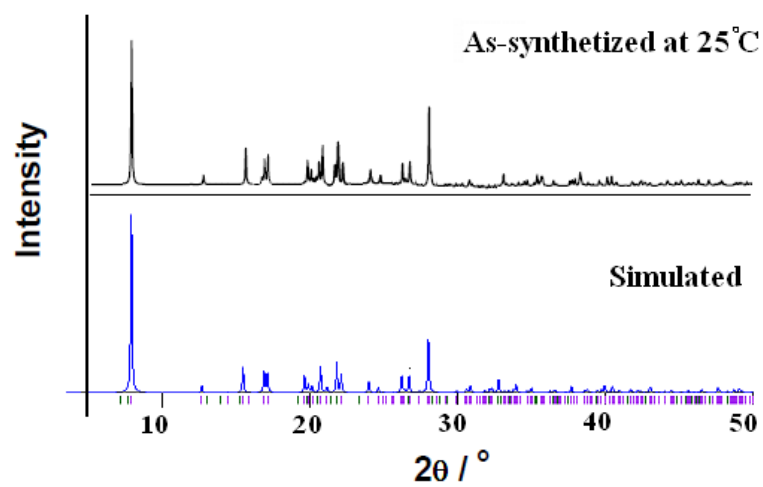

Supplement: c3nj40783g.pdf [file c3nj40783g.pdf]
